# Supplementary material for: OnionMHC: A Deep Learning Model for Peptide - HLA-A*02:01 Binding Predictions using both Structure and Sequence Feature Sets
Source: Research Square preprint supplement (doi:10.21203/rs.3.rs-124695/v1), 2020-12-15
Supplement: Supplementary file 4 [file d4db19276878da1bcd1f3739.xlsx]

## Sheet: Table S2
OnionMHC: a deep learning model for peptide - HLA-A*02:01 binding predictions using both structure and sequence feature sets
Shikhar Saxena, Sambhavi Animesh, Melissa J. Fullwood, and Yuguang Mu
Table S2: Binding energy calculations using g_mmpbsa
	Binders			Non-binders
	FLDEFMEGV	LLIDLTSFL	NLIDFNFKL	ANRAVKPTG	DIKVQFQSG	TPTAYRPPN
van der Waals' Energy (kJ/mol)	-356.979	-338.469	-352.959	-258.422	-280.413	-247.871
Electrostatic Energy (kJ/mol)	-615.496	-493.245	-462.408	-793.008	-420.478	-389.671
Polar Solvation Energy (kJ/mol)	1171.43	892.681	798.575	829.111	716.043	476.258
SASA Energy (kJ/mol)	-42.418	-41.972	-42.221	-37.779	-37.202	-30.981
Binding Energy (kJ/mol)	156.537	18.994	-59.012	-260.098	-22.05	-192.265
