# Supplementary material for: OnionMHC: A Deep Learning Model for Peptide - HLA-A*02:01 Binding Predictions using both Structure and Sequence Feature Sets
Source: Research Square preprint supplement (doi:10.21203/rs.3.rs-124695/v1), 2020-12-15
Supplement: Supplementary file 5 [file 1aa050498903589e2a81782f.xlsx]

## Sheet: Table S3
OnionMHC: a deep learning model for peptide - HLA-A*02:01 binding predictions using both structure and sequence feature sets
Shikhar Saxena, Sambhavi Animesh, Melissa J. Fullwood, and Yuguang Mu
Table S3: Binding Affinity dataset of peptides with HLA-A*02:01 used for model training (taken from IEDB)
Peptide Sequences	Binding Affinity (nM)	Log transformed binding affinity (capped at 50000 nM)
AAAATCALV	41.0052	0.656768
AAAFVNQHL	5017	0.212499
AAAKAAAAV	392.232	0.448061
AAAKTPVIV	34725.6	0.0336926
AAAQGQAPL	20000	0.0846866
AAASSLLYK	59419.2	0
AAAWYLWEV	4.02536	0.87129
AADFPGIAR	20000	0.0846866
AADKAAAAY	10000	0.14875
AADSFATSY	20000	0.0846866
AAEQRRSTI	78125	0
AAFEDLRLL	15541.5	0.107998
AAGAAVKGV	56832.9	0
AAGIGILTV	290.293	0.475877
AAGLPAIFV	20000	0.0846866
AAGLQDCTM	50000	0
AAHARFVAA	1791.73	0.307663
AAICTHLEV	9213.68	0.156319
AAIDRQVSV	1470.66	0.325913
AAIGLAWIP	280336	0
AAILKQHKL	20000	0.0846866
AAIRILQQL	20476.7	0.0825096
AAITDAAVA	18551.4	0.0916356
AAKKKGASL	20000	0.0846866
AAKTPVIVV	9426.06	0.154213
AALEGLSGF	1900	0.30224
AALGGSVNI	1455.78	0.326853
AALGLWLSV	3000	0.260025
AALQGGGPP	65072.4	0
AALSSLAKH	98504.8	0
AAMAAQLQA	2618.1	0.27261
AAMDDFQLI	7965.18	0.169776
AAMYQYIFL	686.342	0.396348
AANDPIFVV	10000	0.14875
AANEIRISK	20000	0.0846866
AAPLILSRI	30000	0.0472122
AAPPPQRAA	1098.17	0.352907
AAQFNASPV	4922.39	0.214258
AAQLQAVPG	20822.5	0.0809619
AARAALQGG	69444.4	0
AARHKHQVM	20000	0.0846866
AARLKRSAT	78125	0
AARNIVRRA	78125	0
AARPDDPTL	10000	0.14875
AASCGGAVF	9948.73	0.149225
AASKQQMLM	78125	0
AASPMLYQL	782.86	0.384188
AASSTHRKV	2644.75	0.271673
AATEAEKQL	50631.8	0
AATKRYPGV	51780.8	0
AAVDLSHFL	696.279	0.39502
AAVKAGAAL	50606.3	0
AAVSADPLA	78125	0
AAVSHLTTL	1052.5	0.356833
AAYARAAAL	1639.22	0.315885
ACMDGFEVV	290.743	0.475734
ACREQQLPV	20000	0.0846866
ADAKAAAAV	10000	0.14875
ADFKLFFRW	9293	0.155526
ADLRFASEF	20000	0.0846866
ADPVDAVIN	7042.28	0.181158
ADVRALGGL	69444.4	0
AEALLADGL	20000	0.0846866
AEAQCTEAS	37168.8	0.0274084
AEDLADHHV	20000	0.0846866
AEDMLNPNY	20000	0.0846866
AEESLSLEA	55555.6	0
AEFGPWQTV	1644	0.315616
AEFKYIAAV	11355.3	0.137003
AEFWDVFLS	20000	0.0846866
AEGTGITHL	20000	0.0846866
AEGVVAFLI	20000	0.0846866
AEHDPWWAV	20000	0.0846866
AEHFENQVL	20000	0.0846866
AEIDRSFKP	20000	0.0846866
AEIESATLF	20000	0.0846866
AEILSGRVI	20000	0.0846866
AEKSRGRRI	20000	0.0846866
AELIDSFTW	20000	0.0846866
AEMGGHAER	20000	0.0846866
AEMKTDAAT	69444.4	0
AEMRAYHGF	20000	0.0846866
AEMRETHWL	20000	0.0846866
AEMVAKYDL	20000	0.0846866
AEMWAQDAA	44699.9	0.0103562
AENCYNLEI	20000	0.0846866
AENDDVRST	13297.4	0.12241
AENGWGFYF	20000	0.0846866
AENKKFKLH	20000	0.0846866
AENLWVTVY	69444.4	0
AENTNTSKS	187288	0
AERGPGQML	10402.6	0.145101
AETESATLF	20000	0.0846866
AEWDRVHPV	620.356	0.405691
AFASLQDML	20000	0.0846866
AFDIASVFF	20000	0.0846866
AFDLSHFLK	69444.4	0
AFDWPELEF	20000	0.0846866
AFFLYDRLA	35807.3	0.0308575
AFFSDLVKF	5000	0.212813
AFGLFWLVW	20000	0.0846866
AFGLYKSIN	245286	0
AFHQLVQVI	20000	0.0846866
AFIHIPGDT	24793.5	0.0648296
AFMATNKAY	20000	0.0846866
AFSMPLGVV	8987.9	0.158612
AFVRFSTDK	78125	0
AFWETKKNL	242360	0
AFYWHFIFR	20000	0.0846866
AGGWVLWKV	20000	0.0846866
AGPPKAENT	66616	0
AGVAGLITG	136066	0
AGVASADPV	162.634	0.529426
AGVNVGEQY	78125	0
AHAGARVNL	5000	0.212813
AHGSTLAGV	59919.1	0
AHGWSTFYL	20000	0.0846866
AHSKAETEA	20000	0.0846866
AHSTIMPRL	20000	0.0846866
AHYEEDVNL	20000	0.0846866
AIAKAAAAV	230.079	0.497363
AIALGVATA	113.545	0.562634
AIDDFCLFA	14	0.75609
AIDFLLQRW	161362	0
AIDFLLRRW	55158	0
AIDPRRIVA	20000	0.0846866
AIFNNRNLA	3174.82	0.25479
AIFQSSMTK	49973.4	4.92726e-05
AIFTDASTV	696.833	0.394946
AIGLAWIPY	245481	0
AIHNVVHAI	166	0.527533
AIIDIEPDL	300.771	0.4726
AIIDILQQL	110.107	0.565476
AIIDPLIYA	260.953	0.485725
AIIDYIAYM	1	1
AIIGLCAYA	81.2958	0.593513
AIILASFSA	274	0.481216
AIIPLSASV	14.2153	0.754679
AIIRIAQQL	28546.9	0.0518009
AIIRILAQL	194.576	0.512853
AIIRILQAL	685.29	0.39649
AIIRILQQA	521.701	0.421698
AIIRILQQL	305.322	0.471212
AIIRMAQQL	4281.89	0.227142
AIIRMLQQL	740.222	0.389364
AIIRTLQQL	2416.36	0.280021
AIITPIVFY	121910	0
AIKCEGLDV	13632.3	0.120111
AIKCVDIVK	20000	0.0846866
AIKNYYRKT	60350.6	0
AIKPITDQF	20000	0.0846866
AIKSNNHLT	27167.7	0.0563776
AILAGEHKC	20000	0.0846866
AILGVLATL	315.877	0.468071
AILHNIYRL	47.7411	0.642711
AILIRVRNA	2800	0.266401
AIMDKNIIL	178.28	0.520937
AIMDKNIKL	14.396	0.753512
AIMDKNIML	74.6849	0.601352
AIMEKNIML	104	0.57075
AIMESDSFL	172.927	0.523754
AIMFKDDNI	9735.72	0.151225
AIMTRCLAV	5.88394	0.836205
AINGVCWTV	9.2116	0.794777
AINGVMWTV	6.03642	0.83384
AINIALIAV	2631.79	0.272127
AINVEKIEL	20000	0.0846866
AIPYFYKGK	20000	0.0846866
AIQIQMFEA	280	0.479214
AIRAGYSIV	5011.47	0.212601
AISAVYFKA	40.6845	0.657493
AISDPCMGL	1563.75	0.320241
AISRLRTQK	20000	0.0846866
AISYCRAFI	169.328	0.525698
AITAASLPK	280842	0
AITDAAVAV	1475.26	0.325625
AITLVVISV	122.046	0.555961
AITRILQQL	9116.08	0.157303
AITTPQMTL	20000	0.0846866
AITTSNCAK	20000	0.0846866
AIVFDHYDV	43424	0.0130327
AIVFVFILT	891.636	0.372163
AIVGGLAEL	12	0.770337
AIVNAQPKC	73771.3	0
AIVVVIILV	6911.62	0.182889
AIYDTMQYV	1	1
AIYGRPVSA	89	0.585145
AIYHPQQFV	313	0.468917
AIYKLGSSI	1100.64	0.3527
AIYVFCISL	119.182	0.558156
AKAIITPIV	146820	0
AKATGRYNL	20000	0.0846866
AKIALAVYK	20000	0.0846866
AKLTEAITA	28554.2	0.0517773
AKNPNRFVI	78125	0
AKYEICLEK	20000	0.0846866
ALAAAAAAK	10000	0.14875
ALAAATPMV	5.72052	0.838808
ALAAGIVGV	20000	0.0846866
ALAAIENYV	2.68641	0.908667
ALADAVKVT	2000	0.297499
ALADQAEAV	26	0.698876
ALAFDSTRV	648.823	0.401544
ALAGFFPVL	12.8	0.764372
ALAGNHWHV	55	0.629629
ALAKAAAAA	88.5845	0.585578
ALAKAAAAI	130.703	0.549628
ALAKAAAAL	196.214	0.512078
ALAKAAAAM	89.4427	0.584687
ALAKAAAAN	10000	0.14875
ALAKAAAAR	10000	0.14875
ALAKAAAAV	33.0327	0.67675
ALAKNASEL	72.796	0.60372
ALALEQYGI	29.6698	0.686673
ALAPSTMKI	4.33746	0.864388
ALAPVFAFL	2.2395	0.925483
ALAPWQQAV	7	0.820152
ALASAAAAV	114.451	0.5619
ALASFLFGF	20000	0.0846866
ALATALTEA	10.4039	0.783528
ALATFTVNI	1	1
ALAVFQPAV	1.58307	0.957544
ALAVLSKCY	5000	0.212813
ALAVVNALL	17.9724	0.733004
ALAWSLQML	4	0.871874
ALCEALTLA	37.0652	0.666104
ALCKVTVPT	99.8968	0.57447
ALCRWGLLL	100	0.574375
ALDATGFVV	9	0.796925
ALDAYHASL	8	0.807811
ALDCQIYGA	143.473	0.541012
ALDEGLLPV	1	1
ALDHYDCLI	180.168	0.519963
ALDISFTGA	220	0.501503
ALDLAKKRV	10000	0.14875
ALDLSHFLK	45061.5	0.00961153
ALDQACFRI	93.0677	0.581015
ALDVYNGLL	96	0.578148
ALDWIGERL	42	0.654552
ALEAKIAQL	103.071	0.571579
ALEEGRKYV	654	0.40081
ALEKGIKDV	6000	0.195962
ALELGRKTL	8000	0.169373
ALEMADTFL	777.933	0.384771
ALEPGFKDY	20000	0.0846866
ALFDGAKPL	4	0.871874
ALFDTSASL	20000	0.0846866
ALFEDYPGC	354.637	0.457374
ALFFFDIDL	2000	0.297499
ALFGYPVYV	7.4	0.815017
ALFHKVQSY	1307	0.336817
ALFPIIWAL	1	1
ALFSGVSWI	2.13046	0.930097
ALFSGVSWV	13.3418	0.76054
ALFYKDGKL	534	0.419545
ALGERLDAV	25.3141	0.701347
ALGGGATGV	1400	0.330464
ALGGSCHTT	20000	0.0846866
ALGIICSAL	20000	0.0846866
ALGLGIVSL	140.522	0.542933
ALGLSAFGV	9.56092	0.791337
ALGMRGLVL	491.335	0.427241
ALGVATAHG	12006.2	0.131851
ALGYQLAFV	12.4629	0.766838
ALGYTTEEI	338.783	0.461601
ALHGSVEEL	5	0.85125
ALHQCFTEL	831.004	0.378672
ALHTALATV	15.5509	0.746379
ALIARCWYL	1	1
ALIAVSLIA	1104.23	0.352399
ALIDFLAAV	3	0.898463
ALIFILLTA	631.715	0.404014
ALIGGFKPV	2	0.935937
ALIGTMCGI	33	0.676841
ALIHHNTHL	238.1	0.494196
ALIICNAII	893	0.372022
ALINDQLIM	96.1538	0.578
ALIRILQQL	28.0994	0.691699
ALIVAIWDK	78125	0
ALIYFLQCI	6.1927	0.831478
ALKEAIEMV	127.766	0.551728
ALKGTNESL	107.772	0.567457
ALKKETIVL	834.016	0.378337
ALKKLIIDR	166378	0
ALKMTMASV	225	0.499426
ALKNNGKVV	43424	0.0130327
ALKNSQAEL	1741.57	0.310287
ALKRAQSEL	41759.6	0.0166449
ALLADKFPV	1.72687	0.949508
ALLAGLVSL	76.3	0.599375
ALLAKRLGA	20000	0.0846866
ALLALTRAI	420	0.44174
ALLAYRCVL	349.943	0.458605
ALLDLGWTI	1	1
ALLDPSQGM	2000	0.297499
ALLDRDCRV	5.59403	0.840875
ALLEACLRV	6.59026	0.825727
ALLEDPVGT	28	0.692027
ALLENIHRV	2	0.935937
ALLFFIVAL	212.921	0.504526
ALLFLMSFT	405.512	0.444984
ALLGAWPAV	2.52792	0.914287
ALLGERPII	7760	0.172188
ALLGGLRPV	2	0.935937
ALLGLTLGV	286.132	0.477212
ALLKHRFEI	60.6508	0.62059
ALLKNPQGI	48.1042	0.64201
ALLPAPITL	131.513	0.549056
ALLQQTWTL	1	1
ALLRMCALV	34.0375	0.67398
ALLSCIRNA	22.9667	0.710341
ALLSDWLPA	94.3	0.579799
ALLSGLNTL	20000	0.0846866
ALLSLVAHY	802.927	0.381848
ALLSRFFNM	1	1
ALLTGSYTI	1	1
ALMAGYFKI	48.992	0.64032
ALMAITKNV	8.40883	0.803205
ALMDKSLHV	17.0997	0.737604
ALMDLLMFS	2.39588	0.919245
ALMDYGFRV	1	1
ALMEITSRY	4640.54	0.219708
ALMEVTHVL	27	0.695388
ALMGAVTSL	6.04932	0.833643
ALMLRLLRI	45.7349	0.646678
ALMPLYACI	557.478	0.415568
ALMPYMPPA	1	1
ALMRGRPGL	1675.4	0.313867
ALMRRIAVV	1.7751	0.946962
ALMRWRHPR	9624.75	0.152285
ALMTLDDLA	67.4031	0.610834
ALNATDPGA	189.093	0.515495
ALNHLVLSL	1	1
ALNIALIAV	23.097	0.709818
ALNIALVAV	79.0758	0.596072
ALNISSTKT	21116	0.079668
ALNKMFCQL	735	0.390018
ALNSKDAAL	33.5595	0.675287
ALPDTVAPV	9.05203	0.796392
ALPEDYDRV	20	0.723124
ALPGPDGVV	552.967	0.416319
ALPHAILRL	127.667	0.5518
ALPHIIDEV	31.3113	0.681696
ALPPPPPPP	12720	0.126513
ALPPRAYAM	1938.84	0.30037
ALPRNMVIT	12500	0.128126
ALPVYLMTL	10.9134	0.779109
ALPYWNFAT	1351	0.333757
ALQAIELQL	1500	0.324088
ALQARGHVV	56	0.627964
ALQDSGLEV	753.802	0.387683
ALQEAYYRA	3.82536	0.876
ALQGGGPPY	69444.4	0
ALQNVMISI	440.207	0.437396
ALQTDNYTL	28.8491	0.689266
ALRANSAVK	78125	0
ALRQANIGV	87	0.587246
ALRSRWRAL	20000	0.0846866
ALSAGVGAV	38.6052	0.662342
ALSALLTKL	312.583	0.46904
ALSDACKKI	1079.87	0.354461
ALSEGVYRI	2.88999	0.901915
ALSELPETL	60.6273	0.620626
ALSGFCAAV	19	0.727865
ALSGFYYVQ	1397.77	0.330612
ALSGVFCGV	12.8078	0.764315
ALSKFPRQL	16000	0.10531
ALSLAAVLV	112	0.563901
ALSLIIVSV	5.42403	0.843727
ALSMADIFI	105.977	0.56901
ALSMGINTV	35.8662	0.669143
ALSNGIPPV	3.71327	0.878749
ALSPALTAL	193.587	0.513324
ALSPPLLLL	158	0.532098
ALSPVLPPM	30.099	0.685345
ALSRKVAEL	100	0.574375
ALSSDGDTV	10	0.787187
ALSSLAKHG	91846.3	0
ALSSSLGNV	23.4394	0.708458
ALSTGLIHL	312.625	0.469028
ALTDVEKRI	1151.11	0.348556
ALTGLPSGL	8140	0.16777
ALTGTEKLI	50000	0
ALTIACMTV	331.785	0.46353
ALTLNTMTK	20000	0.0846866
ALTNAQFFV	1.33731	0.973136
ALTPPFHPY	9000	0.158487
ALTVVWLLV	128	0.551559
ALVACVAAL	55.3793	0.628994
ALVAFLRFL	21.7879	0.715211
ALVALVITI	1.90563	0.940404
ALVARAAVL	11111	0.139013
ALVAVSLIA	3687.33	0.240959
ALVAWLTHA	15.437	0.747059
ALVCGLRQL	22815.1	0.0725154
ALVEICTEM	50.1599	0.638143
ALVELNSGV	9.34789	0.79342
ALVEMGHHV	334	0.462915
ALVGLFVLL	26	0.698876
ALVLLMLPV	31.2	0.682025
ALVSDCAST	115.041	0.561425
ALVSEVTEV	79.8999	0.595114
ALVSGTATA	133.595	0.547605
ALWDSNFFT	3693.23	0.240811
ALWDVPSPA	2.72978	0.907186
ALWEIQQVV	17.1523	0.737321
ALWGAFPVL	11.3	0.775892
ALWGFFPVL	2.7	0.9082
ALWGPDPAA	879.8	0.373398
ALWIPDLFM	1	1
ALWMRLLPL	748.8	0.388299
ALWYFFPVL	5.2	0.847625
ALYACVLAA	5.57039	0.841266
ALYDVVSTL	26.7401	0.696282
ALYEENALK	20000	0.0846866
ALYGALLLA	7.2	0.817549
ALYGWTVLV	2	0.935937
ALYKGFQFI	5.21989	0.847273
ALYLLDGLR	20000	0.0846866
ALYLVCGER	90240	0
ALYRRIQRR	78125	0
ALYSYASAK	57	0.626328
ALYWALMES	21	0.718615
ALYYSVENV	37.9419	0.663943
ALYYVHSLL	228.667	0.497932
AMAAGLSSL	142	0.541966
AMAAQLQAV	7.0477	0.819525
AMAETGCDA	773.637	0.385283
AMAGGIGVL	104	0.57075
AMAGSIDLL	4	0.871874
AMAKAAAAV	11.6279	0.773248
AMALSIVSL	10.8646	0.779523
AMASTEGNV	630.976	0.404122
AMDLVLAAV	4.35478	0.86402
AMDSDLGSL	977.78	0.363639
AMDSNTLEL	122.067	0.555946
AMDTHLYFE	20000	0.0846866
AMEDLVRAY	10000	0.14875
AMEGGTTKA	20000	0.0846866
AMEKSSKYY	1166430	0
AMFIGHATA	1	1
AMFQDPQER	3500.91	0.245754
AMFTAALNI	2.44502	0.917369
AMFTTMYNI	2.79322	0.905063
AMGAASLTL	173.936	0.523217
AMGLVFICV	23.2929	0.709037
AMGPTLIGL	3	0.898463
AMGRGGTEV	87	0.587246
AMHARMAAV	18.8999	0.728353
AMHDKKIDI	8844.56	0.160098
AMHYIRHRA	107.833	0.567405
AMIDRLHQT	234.807	0.495483
AMILAAYHP	1	1
AMISLAKKI	903	0.370992
AMITYITRK	20000	0.0846866
AMKADIQHV	167	0.526978
AMLAAIRRV	63.3728	0.616532
AMLAGTAVV	5.96648	0.834917
AMLGHAGDM	6000	0.195962
AMLHWSLIL	113.95	0.562305
AMLNGLIYV	2	0.935937
AMLQDMAIL	1400	0.330464
AMLQLDPNA	192.308	0.513937
AMMARDTAE	20000	0.0846866
AMMWRIAQL	26.7307	0.696314
AMNEENRFV	6797.9	0.184422
AMNREVSSL	92.1394	0.581941
AMNRRIMNV	1190.26	0.345465
AMPEEETTE	339481	0
AMPGVLSYV	5.12042	0.849051
AMPKTIYEL	37.7652	0.664375
AMQDPNPEV	189.7	0.515199
AMQTMLFTM	5.98245	0.83467
AMRWGHLPL	26	0.698876
AMTAFFGEL	49.6538	0.63908
AMTMFYPGV	67.0417	0.611331
AMVDGVSVL	9	0.796925
AMVEYVSAG	3233.9	0.253086
AMVGAVLTA	75.5	0.600349
AMVPLVMVI	434.967	0.438503
AMVQVHSQG	102018	0
AMVTLRKER	30298	0.0462987
AMWDWSKSV	1	1
AMWLLLLSI	7.63555	0.812121
AMYDPQTYY	20000	0.0846866
AMYRDMATI	8	0.807811
AMYVAIQAV	2.82297	0.904084
AMYYRRTER	2955.83	0.261396
ANFLGKIWP	40182.7	0.0202024
ANPGRVKDW	20000	0.0846866
ANRLTTLQR	20000	0.0846866
APAKKAAAK	20000	0.0846866
APAKKAAPA	20000	0.0846866
APDGFYPFK	20000	0.0846866
APEEKYLSM	20000	0.0846866
APERQRLLP	69444.4	0
APFARLLNL	161489	0
APGKSLGTL	5000	0.212813
APGWLIWTY	2906.3	0.262958
APIEHIASM	20000	0.0846866
APILVVSGI	20000	0.0846866
APKEFRGAL	20000	0.0846866
APPHGGIAF	20000	0.0846866
APPPQRAAM	9479.49	0.15369
APRALLLLL	20000	0.0846866
APRARTAAF	20000	0.0846866
APRELLQYI	507	0.42434
APRGFRAAF	20000	0.0846866
APRQPGLMA	20000	0.0846866
APRRRDEEL	20000	0.0846866
APRTLVLLL	20000	0.0846866
APRTLVYLL	41759.9	0.0166442
APRTVALTA	20000	0.0846866
APSYRNFSF	20000	0.0846866
APTGDLPRA	21800	0.0767218
APTLHRLGI	20000	0.0846866
APVESMALF	20000	0.0846866
APYFATVRL	20000	0.0846866
AQFAPSASA	380.468	0.450876
AQFLYLYAL	1	1
AQFNASPVA	1344.04	0.334234
AQGYKVLVL	4875.53	0.215142
AQIDNYNKF	11369.4	0.136888
AQIGIFAPV	1	1
AQIGVIGVF	126	0.553015
AQKLATKPV	20000	0.0846866
AQLLTEFAI	25000	0.064063
AQLPRWVAT	19874	0.0852709
AQLQAVPGA	170.388	0.525122
AQLYAYAGF	20000	0.0846866
AQMGTLLIA	36.7045	0.667008
AQMVWIHGV	1.73248	0.949208
AQNAISTTF	20000	0.0846866
AQNISFKSI	3077.04	0.257681
AQPAPQAPY	5000	0.212813
AQPGLLSYV	135.189	0.546509
AQPKCNPNL	47572.4	0.00459993
AQRAAGPSV	5000	0.212813
AQRELFFTL	1296	0.337598
AQRPAKYSY	20000	0.0846866
AQRWANQIR	48	0.642211
AQSDFMSWV	2	0.935937
AQSYLRNFL	593.637	0.40976
AQYIGLVES	2947.51	0.261656
ARAAARAAL	78125	0
ARAALQGGG	69444.4	0
ARAARAAAL	78125	0
ARADGILRF	20000	0.0846866
ARFSGLLIV	460684	0
ARIDARIDF	20000	0.0846866
ARLFGIRAK	20000	0.0846866
ARLGKGYMF	20000	0.0846866
ARLKIRGSL	20686.6	0.081567
ARLLNLSGV	9982.9	0.148908
ARLSSPIVL	20000	0.0846866
ARPKRWLLI	78125	0
ARVAASLAK	20000	0.0846866
ARWLFPVYL	360	0.455987
ARYAAAAAL	78125	0
ARYARAAAA	78125	0
ARYARAAAL	78125	0
ARYGIFLPF	20000	0.0846866
ARYSNFAWY	20000	0.0846866
ASAKAAAAV	500	0.425625
ASDDLEHWQ	20000	0.0846866
ASDPSFPDI	20000	0.0846866
ASDRISGIL	20000	0.0846866
ASDTPSATT	613821	0
ASDYSQGAF	5000	0.212813
ASEELMDKY	20000	0.0846866
ASENSSAMV	147042	0
ASFKAGKLR	20000	0.0846866
ASHFISNSW	20000	0.0846866
ASLFLPKLV	11909.4	0.132599
ASLPTTIAK	78125	0
ASNIVLDQI	86156.6	0
ASPMLYQLL	39638.1	0.0214637
ASPVAQSYL	78125	0
ASRGLWDSF	20000	0.0846866
ASSEPHCAL	20000	0.0846866
ASSGKLGLI	84320.1	0
ASSSNYNTY	20000	0.0846866
ASSWAPTQK	20000	0.0846866
ASTNRQSGR	66720.1	0
ASTVIYRGT	222056	0
ASTVIYRGV	7441.7	0.176059
ASYQFQLPY	20000	0.0846866
ASYRLCLYR	20000	0.0846866
ATAAAAAAK	10000	0.14875
ATAAATEAY	20000	0.0846866
ATADLELAY	817.833	0.380148
ATAGWTFGA	98.2634	0.575994
ATAHGSTLA	54294.9	0
ATAKAAAAV	200	0.510312
ATAKAAAAY	10000	0.14875
ATAQMALQL	40363.7	0.0197871
ATCGLVGLV	14938	0.111658
ATDALMTGF	11400.6	0.136635
ATDALMTGY	1445.15	0.32753
ATDFKFAMY	20000	0.0846866
ATDKAAAAY	10000	0.14875
ATDPDADAI	39062.5	0.0228156
ATEDPSSGY	378663	0
ATESDAIRT	10788	0.141739
ATFEAVLAK	20000	0.0846866
ATFEVFLAK	20000	0.0846866
ATFRLECPY	20000	0.0846866
ATFSRPGSL	20000	0.0846866
ATFSVPMEK	20879.6	0.0807088
ATGDYVAFV	67	0.611388
ATGFGTNET	393308	0
ATGKCNPNL	12291.7	0.129679
ATGRNECDV	10000	0.14875
ATHKAPQPA	13473.7	0.121194
ATIGTAMYK	5044.18	0.212
ATISTSPQS	107754	0
ATISYRIKL	106.597	0.568471
ATIWQLLAF	3	0.898463
ATKDSFQSF	20000	0.0846866
ATKRYPGVM	78125	0
ATLGPANRI	17048.3	0.0994451
ATLGTVILL	178	0.521082
ATLLSQVEV	7119	0.180157
ATLNTLITL	56.9131	0.626469
ATNDGLIKK	20000	0.0846866
ATNIFPFFV	16.7339	0.739603
ATNLEYKTL	85792.4	0
ATNNLGFMY	20000	0.0846866
ATNNVFRLK	20000	0.0846866
ATPQDLNTM	28845	0.0508408
ATQPVHWFL	115.587	0.560987
ATRAVMMGL	20000	0.0846866
ATSGYRIAY	20000	0.0846866
ATSIYTIER	78125	0
ATSYLEYEI	4956.3	0.213624
ATTAAGPPK	354278	0
ATTELRTFS	201872	0
ATTHSWIPK	20000	0.0846866
ATVANVFLY	9766.3	0.150935
ATVGIMIGV	35.7	0.669573
ATVKGMQSY	5000	0.212813
ATVVIGTSK	20000	0.0846866
ATWAENIQV	780	0.384526
ATYGIIVPV	3.2	0.892498
ATYGTAVNK	20000	0.0846866
ATYHIIIVA	6420.4	0.189703
ATYTGVFDK	20000	0.0846866
AVAEAQCKK	69444.4	0
AVAKAAAAV	177.123	0.521539
AVANCVRNL	4964.96	0.213463
AVASGLLWV	18.9144	0.728282
AVATTHSWI	32931.8	0.0385945
AVAVARVAA	20000	0.0846866
AVAVHDFFK	20000	0.0846866
AVCNLASVA	17794.9	0.0954836
AVDADDSHF	20000	0.0846866
AVDLSHFLK	52662.9	0
AVDLSHFLR	59156.1	0
AVDLYHFLK	69444.4	0
AVDPAKAYK	32896.7	0.0386931
AVDRGCLRI	3509.1	0.245538
AVDWYQQRI	20000	0.0846866
AVEDFLAFF	20000	0.0846866
AVEGGLYPV	2	0.935937
AVFDSFVER	20000	0.0846866
AVFGPFWIL	963.763	0.364974
AVFGPLWIL	265.08	0.484275
AVFGVVAIV	250.288	0.489582
AVFLSYIGY	20000	0.0846866
AVGELLAPV	84.128	0.590348
AVGFFPTGV	3	0.898463
AVGIGLRLV	127.867	0.551656
AVGVVCTGL	20000	0.0846866
AVHDPERPL	3937.76	0.234886
AVHGYYIGY	20000	0.0846866
AVIGALLAV	17.9	0.733377
AVIIMAINV	963.072	0.36504
AVINTTCNY	14613.3	0.113689
AVIPFDDIV	915.219	0.36975
AVITETIPI	466.585	0.432018
AVKDKNWTV	1812.11	0.306617
AVKGVGTMV	78125	0
AVLADFSLV	134.448	0.547017
AVLAFVALI	107.14	0.568001
AVLLHEESM	22577.9	0.0734812
AVLQSGFRK	14649.9	0.113458
AVLSEYETM	12644	0.127067
AVLSIVNRV	140.534	0.542925
AVLVVMACL	4153	0.229967
AVLYYHMMK	311009	0
AVMDPFIYA	758	0.38717
AVMFFPFWF	78125	0
AVMLVHTYY	20000	0.0846866
AVNAATYNR	20000	0.0846866
AVNEEWLTA	17309.4	0.09804
AVNGVMWTV	9.13302	0.795569
AVNKSNKPL	35483.3	0.0316976
AVNPGLLET	18563.8	0.091574
AVNTPVSMT	55514.4	0
AVPQVLGGL	20000	0.0846866
AVPTAQSQV	9503.1	0.15346
AVREATAAF	20000	0.0846866
AVRHFPRIW	78125	0
AVRLVVGPL	863.7	0.375105
AVRNAKAAV	938	0.367478
AVRQFRASV	20000	0.0846866
AVRQKSRWI	20000	0.0846866
AVSFRNLAY	5000	0.212813
AVSHLTTLA	3075.6	0.257725
AVSKNRRQL	20000	0.0846866
AVSSGKNIK	163910	0
AVSVYGAIT	7229.48	0.178733
AVTAALHRK	20000	0.0846866
AVTDRETDV	5646.52	0.201574
AVTLNRIKI	1148.26	0.348785
AVVGFLLGV	10.1952	0.785401
AVVKSDNKL	78125	0
AVVPIIPFL	1031.08	0.358733
AVVYSTCTV	104.288	0.570494
AVWDQYKDL	12500	0.128126
AVWISLAQV	259.11	0.48638
AVYFKAKWL	11416	0.13651
AVYGNIKHK	78125	0
AVYGNITHK	69444.4	0
AVYKTYGQY	20000	0.0846866
AVYLLDGLR	20000	0.0846866
AVYSSSMVK	78125	0
AVYSTFLHR	20000	0.0846866
AWIPYFGPA	20036.3	0.084519
AWKQVLAEL	78125	0
AWLLNILTI	1.95748	0.937923
AWQSVGHMM	179830	0
AYAKAAAAF	10000	0.14875
AYDDAEQMY	20000	0.0846866
AYDHGNVIL	20000	0.0846866
AYERMCNIL	78125	0
AYFATPASV	2271.78	0.285723
AYGSFVRTV	13000	0.124501
AYGSRFHEW	20000	0.0846866
AYIDNYNKF	13390.1	0.121769
AYIDNYNKV	2124.09	0.291936
AYKKQFSQY	20000	0.0846866
AYLLQHLDL	20000	0.0846866
AYMDRKSFK	20000	0.0846866
AYQQGVKTL	20000	0.0846866
AYSPFAFKK	20000	0.0846866
AYSSWMYSY	37420	0.0267858
AYYWNQNGF	20000	0.0846866
CAAMDDFQL	10935.5	0.140484
CADGTRHTY	20000	0.0846866
CAGGYYDVY	26629.6	0.0582268
CAPHRVSGV	298.369	0.473341
CARRRLRTL	20000	0.0846866
CASSSDWFY	20000	0.0846866
CAVIPFDDI	17019.1	0.0996036
CAVNTPVSM	49057.3	0.0017591
CEALLADGL	20000	0.0846866
CEKRLLLKL	20000	0.0846866
CELSSHGDL	5000	0.212813
CERYGFPAS	20000	0.0846866
CFMYSDFHF	383.545	0.450131
CFNPMIVEL	12301.4	0.129606
CGDGRRRVY	69444.4	0
CHATLTHRL	20000	0.0846866
CHKGWGVSV	20000	0.0846866
CIDGKWNPV	8.30013	0.804407
CIDILRSLE	51013.3	0
CIEYVTLNA	11111	0.139012
CIFYDRDDV	5767.97	0.199607
CILESLFRA	68	0.610019
CINGACWTV	357.218	0.456704
CINGAWCTV	529.775	0.420279
CINGECWTI	22783.8	0.0726421
CINGEWCTI	4233.71	0.228188
CINGEWCTV	2858.98	0.264475
CINGVCRTV	297500	0
CINGVCWSI	1220.78	0.343125
CINGVCWSV	119.546	0.557874
CINGVCWTA	2703	0.26966
CINGVCWTI	10024.8	0.148521
CINGVCWTV	246.923	0.490833
CINGVMWTV	10.3248	0.784233
CINGVSWTV	1271	0.339399
CINGVWCTI	2256.29	0.286355
CINGVWCTV	269.174	0.482858
CIPSRSKML	78125	0
CIRHEMTPV	1329.07	0.33527
CIRNASKFV	78125	0
CISQHQHLA	448.51	0.435669
CIVAAVIIM	1574.98	0.319579
CIYQSPVRK	29838.1	0.0477123
CKTILKALG	68725.2	0
CLAEYCTSL	185.52	0.517258
CLALSDLLV	357.05	0.456747
CLCSFHNDA	4142.32	0.230205
CLDAGINYV	1	1
CLEKVQRQI	21940.2	0.0761293
CLERDLQRL	10000	0.14875
CLGGHQEAI	801	0.38207
CLGGLLTMV	28.1818	0.691428
CLHHAYQGD	119311	0
CLIFLLVLL	100.686	0.573743
CLINDPWVL	126.598	0.552577
CLIQKALFM	787.57	0.383633
CLKDIIDFL	671.343	0.398391
CLLCNLLLV	59.8762	0.621778
CLLQSLQQI	159	0.531515
CLMMILPAA	1.21411	0.982069
CLMTYSHHA	1	1
CLPAAPDGI	3842.1	0.237159
CLPACVYGL	74.9258	0.601055
CLPPPPDGV	1494	0.324458
CLRRFIIFL	1387.95	0.331263
CLSDEINHV	11	0.778379
CLSDLLGFL	87.9252	0.586268
CLTEYILWV	11	0.778379
CLTFGRETV	50000	0
CLTSTVQLV	165.106	0.528032
CLTVPNITI	1190.26	0.345465
CLVSGLSSL	4	0.871874
CLVTRHADV	8345	0.165471
CLWLLTLGL	20000	0.0846866
CLWPKTHTL	13.8669	0.756972
CMAFTIPSI	1	1
CMFGVVSPA	9.49106	0.792015
CMIRWLGGI	428.3	0.439931
CMLDGGNML	55.9017	0.628126
CMMIEPPKL	25000	0.064063
CMSANEAAI	16.3989	0.741472
CNYSKFWYL	6959.59	0.18225
CNYSKYWYL	16330.4	0.103421
CNYTKFWYV	725.315	0.391244
CNYTRFWYI	1660.57	0.314689
CPPTCPGYR	78125	0
CPRIFSHSF	20000	0.0846866
CPTLKKGFL	20000	0.0846866
CQCTVQEFI	2198.63	0.288748
CQLAKTCPV	208.3	0.506554
CQLIIQAFE	1486.67	0.324913
CRAPRKKGC	69444.4	0
CRTAFKPVL	20000	0.0846866
CSDDGFWSK	20000	0.0846866
CSEVPQSGY	20000	0.0846866
CSEYVKDIY	20000	0.0846866
CSSISIKLT	729488	0
CTANSWNVI	794.213	0.382857
CTDDNALAY	20000	0.0846866
CTDKFSQLF	20000	0.0846866
CTDPPLLSV	525.933	0.420952
CTEETKRNI	78125	0
CTELKLSDY	20000	0.0846866
CTINVNSLA	1037.81	0.358132
CTIVDSMII	5155.93	0.209974
CTMERTNDL	345.086	0.459897
CTSEIQNVT	13507.8	0.12096
CTVPTMNNA	16145.5	0.104474
CTWPEASRY	20000	0.0846866
CVDHPFIYV	546.204	0.417456
CVDNHLGAT	52083.3	0
CVFKFIVAK	20000	0.0846866
CVGDHQAAM	27059.1	0.056748
CVLTTIDGV	292.637	0.475134
CVMYASALV	9.32354	0.793661
CVNGSCFTV	2935.37	0.262038
CVNGVCWTV	1168.53	0.347167
CVRLNNPVI	31707.1	0.0420973
CVRNLEELT	41099.7	0.0181169
CYDLMSFLE	20000	0.0846866
CYHSGGTII	78125	0
CYMHVSDFY	20000	0.0846866
CYMHVSDYY	20000	0.0846866
CYPGKFVNE	33119.1	0.0380703
CYPRLWGVR	20000	0.0846866
DAAAPLPPV	20000	0.0846866
DAAASSLLY	69444.4	0
DAAVAVAAA	5195.54	0.209267
DAAVVFPPV	20000	0.0846866
DACKKILSA	14379	0.115183
DAFSREYSM	7568.16	0.174502
DAIKSNNHL	51833.3	0
DAINKCVDI	39983.7	0.0206614
DAKRNSKSL	78125	0
DAMIHKTYI	8170.46	0.167425
DANVVSSST	7634.66	0.173693
DARYCSEFI	12024.7	0.131709
DASLMDMIT	10505.7	0.14419
DAVEDFLAF	20000	0.0846866
DAVVADLSA	16632.4	0.101728
DAYGFHNYK	20000	0.0846866
DAYKFSCGL	9873.94	0.149922
DAYNIADAA	78125	0
DAYRAIHSL	78125	0
DAYRRIHSL	78125	0
DCKTILKAL	78125	0
DDALFIYGY	20000	0.0846866
DDQEKKILM	1722270	0
DEEAINLFH	20000	0.0846866
DEFLKVPEW	20000	0.0846866
DEFVADIPS	20000	0.0846866
DEGFHAATV	20000	0.0846866
DEHLRGFSK	78125	0
DEHLRGFSM	78125	0
DEISLLLAS	20000	0.0846866
DEKPKVMEG	20000	0.0846866
DELWRGLLA	20000	0.0846866
DEMVCKWLL	20000	0.0846866
DEQEFFYSQ	20000	0.0846866
DETFVHSGF	20000	0.0846866
DEVEFLGHY	46665.8	0.00637819
DEVVYTHGA	20000	0.0846866
DEWECTRDD	20000	0.0846866
DEYGPVFVE	20000	0.0846866
DEYLCVNAT	69444.4	0
DFDGTPRLY	20000	0.0846866
DFGYATMAK	20000	0.0846866
DFIGKTIGF	20000	0.0846866
DFISMYFPW	20000	0.0846866
DFLLQRWGG	16824.4	0.100667
DFLLRRWGG	56412.9	0
DFPIFNQRY	20000	0.0846866
DGAEGINPY	20000	0.0846866
DGFGVHLAF	20000	0.0846866
DGIRGFPRC	125634	0
DGQQFYWPV	57192.4	0
DHIPIINTL	20000	0.0846866
DHLGLDDQE	320723	0
DHLKEKSSL	20000	0.0846866
DHQAAFQYI	25700.9	0.0615074
DHQLDPAFR	35895.8	0.0306294
DIAEHGAYY	20000	0.0846866
DICSKHMDA	74300	0
DIDEILGIA	69444.4	0
DIEITCVYC	649	0.401519
DIIDFLEGA	445.294	0.436335
DIINSVSII	1278.89	0.338827
DIIRAHPWF	39470	0.0218565
DIKDTKEAL	20000	0.0846866
DIKLIDIAL	20000	0.0846866
DIKPDNILL	20000	0.0846866
DIKYDNKLL	26462.8	0.0588074
DILANRDST	69444.4	0
DILASIIDY	20000	0.0846866
DILQMREII	3357.27	0.249626
DIMLPESDL	12886.8	0.12531
DIMTSTRTI	3455.47	0.246961
DINESMSQM	78125	0
DINITHTNI	12599.4	0.127394
DINSDNSNI	24845.2	0.064637
DINVIGLIV	5498.99	0.204021
DIRDKYMEL	10280.4	0.146193
DIRQDVIAM	20000	0.0846866
DIRTLLPIL	37603.6	0.0263337
DISDVKVLA	13357.6	0.121993
DISINSEYI	3010.22	0.259711
DISPTNIPL	20000	0.0846866
DISSFYWSL	8507.68	0.163687
DISVNASKT	78125	0
DITFLRPVL	78125	0
DITNILGGV	11365.5	0.13692
DIVGGLFTY	20000	0.0846866
DIVKGLSGY	20000	0.0846866
DIVRVFNEY	20000	0.0846866
DIVSDSKKI	23932.5	0.0680962
DIVSKLTFL	7814.37	0.171543
DIYRIFAEL	12000	0.131899
DKIDQIIHD	387269	0
DKLVDPINY	36357	0.0294493
DLAAGVDVV	3242	0.252855
DLAARNVLV	50000	0
DLADQLIHL	178	0.521082
DLAEWVPRV	4.32246	0.864708
DLAQDPMLI	20000	0.0846866
DLARNLGLV	14629.3	0.113588
DLDKVYEIL	29650.2	0.0482963
DLEDLKDQI	24324.1	0.0665961
DLEKYNLAF	20000	0.0846866
DLENLYAVT	6550.19	0.187853
DLENNLVKL	16235.8	0.103958
DLENRCQSL	12584	0.127507
DLERKVESL	121.363	0.55648
DLFATQPGL	12500	0.128126
DLFGIWSKV	25000	0.064063
DLGEELEAL	26540.2	0.0585376
DLGPAFTEL	219	0.501924
DLKDLEAHI	83379.7	0
DLKDQIAQL	15714.6	0.106974
DLKHATDYI	15456	0.108508
DLKITDVII	1640.19	0.31583
DLKLVDVKL	20000	0.0846866
DLKPDNILL	154	0.534468
DLKPENILL	20000	0.0846866
DLKPQNILL	2000	0.297499
DLKRIGASL	20000	0.0846866
DLLENLQAY	20000	0.0846866
DLLLPSTDV	1482.08	0.325199
DLLNSMMNR	78125	0
DLLNVKMAL	181.223	0.519424
DLLNVTYNI	786.607	0.383746
DLLVSGSNV	50000	0
DLMEFIDGI	74.2128	0.601939
DLMGYIPLV	8.81797	0.798814
DLMLLSYSL	161	0.53036
DLMSSKDDV	4292.04	0.226923
DLNGAQIKL	50569.6	0
DLNIFMTLV	1116.25	0.351398
DLNKVIQFL	20000	0.0846866
DLNQAVNNL	32119.8	0.040902
DLNRMPTDM	78125	0
DLPEQLTEL	829	0.378895
DLPPAIAAE	20000	0.0846866
DLQDVIQEI	20000	0.0846866
DLQPCIDLI	14684.3	0.113241
DLQQSLRVL	50000	0
DLSDQIAEL	2217.48	0.287959
DLSKLSKDV	6356.2	0.190632
DLSLGNQEL	10000	0.14875
DLSNSMRDF	20000	0.0846866
DLSRHSWDL	20000	0.0846866
DLTAALRDV	10569.1	0.143634
DLTALLSCI	13490	0.121081
DLTDYLMKI	2029.1	0.296164
DLTGDLEAL	16949.4	0.0999828
DLTTKNVSI	52798.6	0
DLVHFASPL	78060.6	0
DLVKSYSLI	78125	0
DLVLFDLDE	425427	0
DLVVLGKVT	53300.2	0
DLVVSYVNV	50000	0
DLWNVMYTL	333.488	0.463057
DLYDMIHNV	15.9666	0.743941
DLYDYITRI	218.739	0.502034
DMAGYAGTL	20000	0.0846866
DMDYHKILT	276916	0
DMICCDSRI	26609.3	0.0582971
DMIDNLNIV	2362.81	0.282092
DMLLNVQTL	3147.48	0.255589
DMLNIMNKL	5116.69	0.21068
DMNLEQWSV	20000	0.0846866
DMPPEVVYL	32940.4	0.0385704
DMPSLSNGL	47245.6	0.00523711
DMRKRIEAF	20000	0.0846866
DMTKVDVEL	3986.8	0.233742
DMTPAELEV	668.703	0.398755
DMWEHAFYL	66.9925	0.611399
DMYDQQLSV	261.967	0.485367
DNSTHNTPV	456368	0
DPKKTGGPI	20000	0.0846866
DPKNWWHIL	20000	0.0846866
DPKVKQWPL	667	0.39899
DPNFHQAVM	20000	0.0846866
DPNPQEVVL	32001.1	0.0412442
DPPEPLVRI	20000	0.0846866
DPRDDLSGM	20000	0.0846866
DPSGAYFAW	20000	0.0846866
DPSMLRTTA	20000	0.0846866
DQFSIPIRY	20000	0.0846866
DQQEAARAA	69444.4	0
DQSIKIGDI	69444.4	0
DQTHIKTIA	13542.5	0.120722
DQYKFHKLL	16025.6	0.105162
DRFFKTLRA	40555.4	0.0193493
DRFYKTLRA	78125	0
DRKLAINSL	78125	0
DRKLARNSL	78125	0
DRKLRINSL	78125	0
DRLASTVIY	20000	0.0846866
DRLHPPNKL	20000	0.0846866
DRYPANAIV	20000	0.0846866
DRYRARHSL	78125	0
DRYRRIHSL	78125	0
DSDGSFFLY	20000	0.0846866
DSDPMDGCE	20000	0.0846866
DSFAKQPQW	20000	0.0846866
DSKGISHFY	13224.1	0.122921
DSLSSQMTS	240166	0
DSMFLMTAT	4401.3	0.2246
DSMGQGDAY	20000	0.0846866
DSPATLSAY	20000	0.0846866
DSPIGPIML	20000	0.0846866
DSQGLPEEL	78125	0
DTAKPTSVY	20000	0.0846866
DTCGASINI	78125	0
DTCLLAISA	6693.01	0.18586
DTDISQLHH	20000	0.0846866
DTDIVNNFI	26205.7	0.0597097
DTEFINKFL	78125	0
DTFGVIDTM	20000	0.0846866
DTGCRIDGY	20000	0.0846866
DTGEESASS	424708	0
DTGKKELAL	3387.47	0.248798
DTIAHINTL	10122.2	0.147627
DTIEIRGVL	16393.5	0.103065
DTIESAKTK	78125	0
DTKCKNNYF	20000	0.0846866
DTLKVCIGY	20000	0.0846866
DTLKVGNTY	20000	0.0846866
DTLVKSGLT	78125	0
DTMRIYCSL	3401.79	0.248408
DTMRPTTVV	83333.3	0
DTMSIYIAV	986.777	0.362792
DTQQHPIVV	13882.3	0.118432
DTRGIFSAY	20000	0.0846866
DTTTDISKY	20000	0.0846866
DTVFDYYVL	719.983	0.391926
DTVLEEMNL	78125	0
DTVLFNAGL	20000	0.0846866
DTVNRTHQY	20000	0.0846866
DTWHGFKNM	20000	0.0846866
DVAASSLLY	69444.4	0
DVCGMFTNR	78125	0
DVCKKNLDL	19488.5	0.0870812
DVDKLVCRD	51921.7	0
DVEKEKFVA	78125	0
DVEKRILNT	9332.26	0.155137
DVELFIKAL	69444.4	0
DVGCLLTDT	78125	0
DVGYEVIGA	32315.3	0.0403412
DVHIPKFKV	62500	0
DVHPGEPVV	78125	0
DVIGNDRQE	20000	0.0846866
DVIKSISSI	32011.8	0.0412131
DVKASMLEK	78125	0
DVKVLAARL	11954.1	0.132253
DVMLVTLPV	152.736	0.53523
DVNEEYTEA	10393.5	0.145183
DVNSVQFSI	11540.7	0.135506
DVRNIVTFI	8662.97	0.162015
DVRTLLGLI	78125	0
DVSLSAYII	1505.16	0.32377
DVSPLMHLF	20000	0.0846866
DVSRPTAVV	83333.3	0
DVSRPTTAV	83333.3	0
DVSRPTTVL	83333.3	0
DVSRPTTVM	69444.4	0
DVSRPTTVV	35915.3	0.0305791
DVTAKSSFV	8564.11	0.163076
DVVQYEQEI	25672.4	0.0616099
DWMDRIEEF	20000	0.0846866
DWMERIEDF	20000	0.0846866
DWSGYSGSF	78125	0
DYAMHGTVF	20000	0.0846866
DYDDVVHEV	1723	0.311278
DYDQRDYGF	20000	0.0846866
DYIYLPLLK	78125	0
DYKECEWPL	20000	0.0846866
DYNFVKQLF	4996.37	0.21288
DYPDDFMDK	20000	0.0846866
DYVPTNKWV	20000	0.0846866
EAAAATCAL	40026.9	0.0205615
EAAITDAAV	2316.13	0.283936
EAARAALQG	69444.4	0
EADPTGHSY	20000	0.0846866
EADVRALGG	69444.4	0
EAEKQLQQY	20000	0.0846866
EAFETQSGA	78125	0
EAFPYEITE	20000	0.0846866
EAIFLIVSL	4436.99	0.223854
EAKTHFSTT	27747	0.0544278
EALYYVHSL	17572.1	0.096648
EARGKEKLL	20000	0.0846866
EASTWLDIF	20000	0.0846866
EATFIDVHI	10685.3	0.142623
EATYHIIIV	10967.6	0.140213
EAVKDKNWT	38668	0.0237537
EAVRHFPRI	78125	0
EAYCALLCK	20000	0.0846866
EDFEIFYNL	20000	0.0846866
EDLIEWAME	94685.7	0
EEAPAAVSF	5000	0.212813
EECDSELEI	5000	0.212813
EEDAAVDDL	20000	0.0846866
EEDEGEELF	20000	0.0846866
EEDLPVTWR	20000	0.0846866
EEFLQCGRL	20000	0.0846866
EEIDWIKTD	20000	0.0846866
EEIRRIWRQ	20000	0.0846866
EEKAFSPEV	69444.4	0
EEMATKADY	20000	0.0846866
EEMNLPGRW	56469.2	0
EEMPLVWDL	20000	0.0846866
EENLIDFAS	20000	0.0846866
EEQTDPKTL	20000	0.0846866
EETLLTTWL	20000	0.0846866
EEVWRDPYL	20000	0.0846866
EFDNYRGTI	20000	0.0846866
EFFDGGLTF	20000	0.0846866
EFFDTEPQL	20000	0.0846866
EFFGWAEGY	20000	0.0846866
EFIPNLFCM	5000	0.212813
EFIYWDWLY	20000	0.0846866
EFKQILTDF	20000	0.0846866
EFKRRLKDL	20000	0.0846866
EFKSRFFVM	20000	0.0846866
EFTSFFYRY	20000	0.0846866
EFVSANLAM	20000	0.0846866
EGAFFLYDR	507625	0
EGAGIDDPV	20000	0.0846866
EGFDPRALI	20000	0.0846866
EGFLKAAMF	20000	0.0846866
EGGVGWRHW	69444.4	0
EGHGFRFEV	28114.9	0.0532103
EGIEGRIAY	20000	0.0846866
EGIYTEGLM	33402.8	0.037282
EGNLAQGFR	20000	0.0846866
EGSRNQDWL	62886.9	0
EHAGVISVL	20000	0.0846866
EHFYWGSVF	20000	0.0846866
EHGIVIRAF	20000	0.0846866
EHNGGDDPL	5000	0.212813
EHVQGDIDL	20000	0.0846866
EHYVRITGL	20000	0.0846866
EIAQHGAWY	20000	0.0846866
EIARIENEM	78125	0
EIDVLPFDI	11534.5	0.135556
EIDVSEVKT	78125	0
EIEEHMRQT	39005.4	0.0229508
EIEIEKNKK	20000	0.0846866
EIEKVEKYL	78125	0
EIFIRYGDA	30471.7	0.0457704
EIFPNIKIY	20000	0.0846866
EIIELTRTL	20000	0.0846866
EIIFYHPTF	20000	0.0846866
EIINNGISY	20000	0.0846866
EIIPKIKAY	20000	0.0846866
EIIPSSIPV	4651.74	0.219485
EIKDRILSY	78125	0
EIKDTEEAL	20000	0.0846866
EIKFNDITF	20000	0.0846866
EIKNRDKIV	46705.1	0.00630051
EIKPKFCLI	18076.8	0.0940307
EIKSLFNTI	20000	0.0846866
EILGIAHLL	4328.39	0.226144
EILNTIQFM	7577.9	0.174383
EILRNYLRL	10469.1	0.144512
EILSNTTKT	17202.6	0.0986125
EILWDVIPF	20000	0.0846866
EIMDKEQLL	3958.59	0.234398
EINATDIII	17067.3	0.0993419
EINNELELV	8266.22	0.166348
EINPFYQDV	19544	0.0868183
EIPGSPGSY	20000	0.0846866
EIPQFMIGL	10649.8	0.142931
EIPTRTLDT	5980.21	0.196267
EIQLKIDKL	3588	0.243483
EIQNVTGFM	41689.8	0.0167994
EIRDQYITA	78125	0
EIRHRSGIQ	20000	0.0846866
EISGLRPGE	20000	0.0846866
EISTNIRQA	178571	0
EITGPIIMI	20000	0.0846866
EIYFSSIHR	20000	0.0846866
EIYRTLYGL	20000	0.0846866
EKAAWGVAL	20000	0.0846866
EKDSNHNVL	20000	0.0846866
EKEGKISKI	78125	0
EKFFPSSSY	20000	0.0846866
EKLKKKSAF	20000	0.0846866
EKPKFLPDL	20000	0.0846866
EKPPVRPIF	20000	0.0846866
ELAAEPTEV	1800	0.307237
ELAAHQKKI	69444.4	0
ELACLLMYL	53.5724	0.63206
ELADARRAL	61092.5	0
ELADKVTKL	2513.15	0.276391
ELADQLIHL	1161	0.347765
ELAKPWPGA	1213	0.343716
ELANEVKVL	7891.19	0.170639
ELAPIRVNA	20000	0.0846866
ELAYYNSCM	4374.33	0.225168
ELCAEAEEL	16191.5	0.104211
ELCEGTTVV	151.764	0.53582
ELDDLLVDL	926.026	0.368665
ELDEIGEDV	2437	0.279234
ELDHLGLDD	513255	0
ELDNVTGLL	9654.31	0.152001
ELDSNLYRI	352.649	0.457893
ELDTLAAEI	9529.97	0.153199
ELEALKTEL	54347.8	0
ELEEICHDL	10923.7	0.140584
ELEKCTSEI	24753.7	0.0649781
ELEKSKRAL	30314.5	0.0462484
ELEKTRRKL	8214.75	0.166925
ELESQISEL	78125	0
ELFGEAFEV	90.3965	0.583706
ELFIAPEGM	20000	0.0846866
ELFYILIAK	20000	0.0846866
ELGGGFGTL	7000	0.181715
ELHNGFTGY	20000	0.0846866
ELHPDKWTV	50000	0
ELIAFSSGT	5339.43	0.206742
ELIKAMNHF	633	0.403826
ELIKELPGY	20000	0.0846866
ELIKELTTL	133.804	0.547461
ELIRRVRRY	20000	0.0846866
ELISSAFKV	18	0.732862
ELKDLLNVT	51571.1	0
ELKETLLHV	4327.62	0.22616
ELKRQLADL	20000	0.0846866
ELLDHLLLF	20000	0.0846866
ELLEMKYAL	280.603	0.479015
ELLEPLYDV	2	0.935937
ELLPAVSSG	193702	0
ELLRPTTLV	2407.21	0.280371
ELLRPTTVV	6708.34	0.185648
ELLSHVGQA	3586	0.243534
ELMESRMRI	246.021	0.491171
ELMMTTIGV	3.42705	0.886162
ELMPIRTDT	69444.4	0
ELMYIFAAL	107.977	0.567281
ELNIVDEII	13736.3	0.119409
ELNKGWFGA	1981	0.298381
ELNLSKFMM	7003.24	0.181672
ELPIVTPAL	20986.7	0.0802358
ELPVKTDIV	11129.4	0.13886
ELPYDENGI	8480.47	0.163983
ELQAALARV	558.136	0.415459
ELQAQIAEL	1093.38	0.353311
ELQENITAH	20000	0.0846866
ELQKFSFKI	166.649	0.527172
ELRELNDRL	2510.07	0.276504
ELRGLLKDV	20000	0.0846866
ELRHYSDSV	50000	0
ELRKRNEAL	20000	0.0846866
ELRQLAQSL	20000	0.0846866
ELRRAAIDR	78125	0
ELRRQVDQL	434.194	0.438668
ELRRTLKEV	50000	0
ELRSLYNTV	69444.4	0
ELRSRYWAI	20000	0.0846866
ELSFEALSL	23930.5	0.0681039
ELSFTVVSN	219906	0
ELSGYCSNI	12500	0.128126
ELSNGMLRF	51069.7	0
ELSRLRYNL	726.475	0.391096
ELTASGGKV	49810.9	0.000350197
ELTEVFEFA	500	0.425625
ELTLTNTSI	12500	0.128126
ELTSNCTRT	48734.5	0.00236942
ELTTLSRHI	18617.4	0.0913077
ELTYLLGMI	7009.84	0.181585
ELVENGKKV	5351.83	0.206528
ELVFIKPPL	27987.6	0.0536297
ELVMDKNHA	78125	0
ELVRKTRFL	20000	0.0846866
ELVRYIELV	291.09	0.475624
ELWKDVDRI	1618.97	0.317034
ELWWVFYAA	287.653	0.476722
ELYENKPDV	515	0.422893
ELYPTVNTY	20000	0.0846866
ELYSPLFLI	9.26982	0.794195
EMADTFLDT	1773.78	0.308593
EMADYIFFV	5.05312	0.850274
EMDKDDESL	339.687	0.461354
EMETLQSQL	6093.29	0.194536
EMFGGTPAV	2.66371	0.909451
EMIQLQEEL	3096.94	0.257086
EMIRYMALV	178.666	0.520737
EMIWDPNGW	20000	0.0846866
EMKEAFHGL	20000	0.0846866
EMKINRQIL	78125	0
EMKLRQKQL	20000	0.0846866
EMKTDAATL	74434.2	0
EMKTQLEEL	20768.5	0.0812017
EMKYALINL	41247.3	0.0177858
EMMAKEEEL	3226.14	0.253308
EMPPHIYAI	323.087	0.465985
EMQLKIDKL	7104.86	0.180341
EMRELRRQV	30508.2	0.0456596
EMSLADYLY	20000	0.0846866
EMVELRILL	92.4226	0.581658
EMYRHILRS	8883.5	0.159692
ENSSAMVQV	276964	0
EPADHLAIM	692	0.39559
EPEPHILLF	20000	0.0846866
EPFLVQFWI	20000	0.0846866
EPFSRRHPL	20000	0.0846866
EPGPSGLLI	20000	0.0846866
EPIVGAETF	20000	0.0846866
EPLWGSLAV	18726.8	0.0907659
EPRVQLVPL	5000	0.212813
EQDGITYYL	20000	0.0846866
EQEFLTAAL	63.8444	0.615847
EQEIESLEA	26255.4	0.0595344
EQFPNATAF	20000	0.0846866
EQGDIALAL	20519.8	0.0823154
EQGLIQYPT	60464.9	0
EQKGIQAWW	20000	0.0846866
EQNWDWNRY	20000	0.0846866
EQRLIDICV	20000	0.0846866
EQRSTAYEI	8921.41	0.159298
EQTSVFSAT	16910.8	0.100193
EQYQQLREA	220889	0
ERAFQNWSV	20000	0.0846866
ERAKIRGSL	78125	0
ERLAIRGSL	78125	0
ERLAKLTEA	174935	0
ERLKARGSL	78125	0
ERLKIAGSL	78125	0
ERLKIRASL	78125	0
ERLKIRGAL	78125	0
ERLKIRGSA	78125	0
ERLKIRGSL	78125	0
ERLQICQRK	20000	0.0846866
ERNEQGQTL	20000	0.0846866
ERNPYENIL	20000	0.0846866
ERPAFGIQK	20000	0.0846866
ERSDKSYEH	20000	0.0846866
ERTDLFFPV	20000	0.0846866
ERTLHLVEL	63788.8	0
ERVRELAVA	69444.4	0
ERWFVRNPF	20000	0.0846866
ERYFRIHSL	1510.98	0.323414
ERYFRINSL	8137.93	0.167793
ERYLKDQQL	78125	0
ERYPGGVSL	20000	0.0846866
ERYPRYNQL	78125	0
ESAERLKAY	20000	0.0846866
ESDKGSSQS	20000	0.0846866
ESENISEPY	20000	0.0846866
ESEVDDPAM	20000	0.0846866
ESLLHQASW	20000	0.0846866
ESRDRKWLY	78125	0
ESSVKEKDM	20000	0.0846866
ESTINLLPY	20000	0.0846866
ETACLGKAY	20000	0.0846866
ETAKVIKLV	24561.7	0.0656976
ETALAIIRR	20000	0.0846866
ETALPQDSY	20000	0.0846866
ETAWPFFYA	163.699	0.528823
ETDDYMFFV	20.4476	0.721079
ETDLNQWMV	162.967	0.529238
ETDQMDTIY	5000	0.212813
ETDRENAII	67336.1	0
ETDVMTRGQ	20000	0.0846866
ETEQPTLDY	20000	0.0846866
ETESATLFT	20000	0.0846866
ETESVNSNY	20000	0.0846866
ETFLQSPPI	142806	0
ETFNTPAMY	36220	0.0297984
ETGFVIPEI	5309.05	0.207269
ETGLSASDV	78125	0
ETIEDYLGY	20000	0.0846866
ETIEEPAVE	20000	0.0846866
ETIEILRNY	20000	0.0846866
ETIFTVLAL	20000	0.0846866
ETIGLVRAL	20000	0.0846866
ETIGNQLYL	3544.34	0.244614
ETIQKDINI	78125	0
ETIRSDTFV	45522.3	0.00867119
ETITEKTFK	78125	0
ETKGKRRLL	20000	0.0846866
ETKKRMDYF	20000	0.0846866
ETKKTMLAL	20000	0.0846866
ETKLGKAGY	78125	0
ETLDVFGPI	20000	0.0846866
ETLFGSYIT	15552.3	0.107933
ETLNEYKQL	78125	0
ETMKPAAMV	20000	0.0846866
ETMYLTMKA	19097.9	0.0889524
ETNDLVTNV	3243	0.252826
ETQSGALEV	29326.1	0.0493119
ETQTGMHAH	20000	0.0846866
ETRSFTTHF	20000	0.0846866
ETSFIFIET	8822.86	0.160325
ETTEANAGQ	20000	0.0846866
ETTQALQLF	20000	0.0846866
ETVKMGAFM	78125	0
ETVNFVPNY	20000	0.0846866
ETVPYDELI	14548.8	0.114098
ETVWPFFYA	8	0.807811
ETWVETWAF	20000	0.0846866
EVADRVIFM	1060	0.356177
EVAEKDAMY	20000	0.0846866
EVAESVMFM	20000	0.0846866
EVATRFNTM	20000	0.0846866
EVCQATSQY	5000	0.212813
EVDEGSDMM	20000	0.0846866
EVDPIGHLY	78125	0
EVEHRTRVR	20000	0.0846866
EVFEIIRSY	20000	0.0846866
EVFFGLSRY	10000	0.14875
EVFHCMDIL	11973.4	0.132104
EVFINDNGI	78125	0
EVGIKSVVV	123.491	0.554874
EVGTNFGTI	20078.7	0.0843235
EVHIYYLEK	20000	0.0846866
EVHYSGINY	20000	0.0846866
EVIEQWHSL	20000	0.0846866
EVIERINLL	7403.68	0.176533
EVIPMFSAL	36483.2	0.0291293
EVIPYTPAM	5697.83	0.200738
EVIRATYPS	20000	0.0846866
EVKSLFNTV	20000	0.0846866
EVKTLSSYI	78125	0
EVLKAMSLY	20000	0.0846866
EVLMSPCRM	27863.4	0.0540409
EVLRPTTLV	13660	0.119924
EVLRPTTVV	83333.3	0
EVMPEKRNV	3032.41	0.259032
EVMPVSMAK	78125	0
EVNAHIHTM	20000	0.0846866
EVNDTHYTV	3063.81	0.25808
EVNSFKAAL	235814	0
EVPAQYLTY	20000	0.0846866
EVREFLGSY	20000	0.0846866
EVRIPVDLV	78125	0
EVRKAIEFV	20000	0.0846866
EVRLATMLF	20000	0.0846866
EVSINVDST	69444.4	0
EVTEIDQLV	86055.1	0
EVVANVIGL	12200.1	0.13037
EVVDMLSTY	20000	0.0846866
EVVGSYIRY	20000	0.0846866
EVVVFGEAV	13372	0.121893
EVWGMRWPI	20000	0.0846866
EWAENCYNL	20000	0.0846866
EWAFWENKK	182555	0
EYAPFARLL	20000	0.0846866
EYIDSAWEW	52265.1	0
EYKKFIATF	20000	0.0846866
EYKKSLYKF	20000	0.0846866
EYKTLCDMI	139180	0
EYLFEVDNL	43706.5	0.0124334
EYRKILRQR	69444.4	0
EYSGGLHGV	17959.9	0.0946307
EYSYYSSMY	20000	0.0846866
EYYFRNEVF	20000	0.0846866
FAAAAARTL	20000	0.0846866
FAAAFFPAV	1.37706	0.970429
FAAELTIGV	1	1
FAAFYFVFI	20000	0.0846866
FAANPNSQV	2044	0.295488
FAAPHRGVA	20000	0.0846866
FAASANFFL	141.509	0.542286
FADINGKLY	20000	0.0846866
FADSDGHYV	141.899	0.542032
FADTVVACV	58.837	0.623396
FAEGVVAFL	2846.05	0.264894
FAFHKEGAF	202443	0
FAFKDLFVV	3	0.898463
FAFKLSFAI	1008	0.360826
FAFRDLCIV	117.817	0.559221
FAFRYVNRL	121.944	0.556039
FAFVTDNTY	78125	0
FAGKTVWFV	10.6103	0.781712
FAHELEMLC	1174.93	0.346663
FAIEALAKA	41.635	0.655359
FAISCFLLC	1355.53	0.333448
FAIVPPLQI	20000	0.0846866
FAKCLVVST	1076.49	0.35475
FALDRPCLV	75.7643	0.600026
FALKKLIID	161312	0
FAMTVPLLI	3	0.898463
FANCNFTLV	79.0327	0.596123
FANDKFTLV	73.9172	0.602307
FANHAFTLV	68.6585	0.609128
FANHDFTLV	101.102	0.573362
FANHKFTLV	148.267	0.537974
FANHNFTLV	119.179	0.558159
FANNEFTLV	46.527	0.645091
FANNGFTLV	36.2304	0.66821
FANNKFTLV	116.1	0.560578
FANPLSNPF	2531.4	0.275722
FANSKFTLV	60.2422	0.621215
FANTEFTLV	63.993	0.615632
FANYGFTLA	1499.34	0.324128
FANYKFTLV	48.9849	0.640333
FANYNFTLL	1030.74	0.358764
FANYNFTLV	15.945	0.744066
FAPKQKMFS	15519.8	0.108127
FARERRLAL	5000	0.212813
FARLLNLSG	48241	0.00331002
FASLFLPKL	1311.7	0.336486
FATTPVCEY	20000	0.0846866
FAVQTIVFI	96.2113	0.577944
FCSDALTLI	124.148	0.554383
FCSNHFTEL	20000	0.0846866
FDAVLYYHM	309149	0
FDLFGITLY	20000	0.0846866
FEADPLSPQ	20000	0.0846866
FEIGNGDAG	20000	0.0846866
FELKNSTTI	10614.8	0.143235
FELLHFISS	20000	0.0846866
FEVDNLTYV	3753.9	0.239305
FFGPIGKLI	12895.4	0.125248
FFGWEGVGV	465.716	0.43219
FFLWVIILF	7445.6	0.176011
FFLYDRLAS	40043.8	0.0205225
FFNVEIPEF	5000	0.212813
FFSPFFFSL	20000	0.0846866
FFSYLMKDK	2494.5	0.277079
FGAAVSLLF	20000	0.0846866
FGALFMWLL	20000	0.0846866
FGAQMGWPV	5	0.85125
FGGGPWWEV	13	0.762939
FGLLPEHYV	120	0.557524
FGLYKSINV	744.1	0.388881
FGNLSPETL	59454.8	0
FGPIGKLIA	20426.8	0.082735
FGSGWTWVV	669.7	0.398617
FGTNETEYL	27449.1	0.0554253
FHAPPPSVC	20000	0.0846866
FHARFVQAL	20000	0.0846866
FHEFLSSKL	20000	0.0846866
FHERGYVKL	20000	0.0846866
FHFNPLPNV	116	0.560657
FHGEFTRAL	20000	0.0846866
FHGIFYSIF	20000	0.0846866
FHGVAKNPV	20000	0.0846866
FHHRIRCKL	20000	0.0846866
FHIVNQESL	20000	0.0846866
FHKDGAFFL	92883.2	0
FHKEGAFFL	97772.7	0
FHKKRVEPL	20000	0.0846866
FHKRDMRLL	20000	0.0846866
FHLRSRFAF	20000	0.0846866
FHMDPSGTF	14440	0.114792
FHNNWGATL	15000	0.111275
FHRKKTDAL	20000	0.0846866
FIADIGIGV	1	1
FIAEIDHWI	22.7804	0.711094
FIAGLIAIV	1.48275	0.963595
FIALNLSFI	78	0.597338
FIALWIPDL	1.85438	0.942924
FIAPLGFSL	6.46768	0.827462
FIASAPQQL	120.42	0.557201
FICWHSSEI	52.9094	0.633211
FIDGISLGL	18.9945	0.727892
FIDILLFVI	14.4345	0.753264
FIDNPLPNQ	28139.6	0.0531291
FIDRGSIKI	6946.7	0.182421
FIDSNEYEV	1	1
FIDSYICQV	34.641	0.672356
FIDSYLQKL	24.1289	0.705779
FIDTVSVYT	231.262	0.496889
FIEHLGEGI	4823.02	0.216143
FIFGKMGAG	20000	0.0846866
FIFLKKNEL	3017	0.259503
FIFLLFLTL	83.8778	0.590624
FIGYMVKNV	442.556	0.436905
FIHFFTWGT	80	0.594998
FIHGGILYA	8.80499	0.79895
FIHIPGDTL	2553.1	0.274933
FIIDNFGSV	1	1
FIIEVSNCV	12.7858	0.764475
FIIFLFILL	142.248	0.541805
FIILLLAIV	595.865	0.409414
FIILSTGKY	20000	0.0846866
FIISTLNKI	6.12479	0.832497
FIISVISLV	1	1
FIKDGSSTY	78125	0
FIKDRATAV	20000	0.0846866
FIKDYRYTY	20000	0.0846866
FIKGFLYHT	1325.43	0.335523
FIKNPACTV	6360.83	0.190564
FIKPPLITL	373.302	0.452633
FIKQGFNNL	28031.6	0.0534847
FIKYVNGWV	2101.77	0.292912
FILDALAQA	2.57888	0.912442
FILDNPGFV	10.6263	0.781573
FILFFAYVM	1236.71	0.341927
FILGIIITV	1	1
FILHRLHEI	1	1
FILIFNIIV	3.23047	0.891622
FIMIVGGLV	382	0.450504
FIMLEGETK	30709.1	0.045053
FINFFNLLA	725.581	0.39121
FINKLNGAM	57781.3	0
FIPENQRTV	4218	0.228532
FIPIIYSKA	162.724	0.529375
FIPISASDM	11575.6	0.135227
FIPQYLSAV	16.9226	0.738567
FIQNIDFKA	35	0.671403
FIQWTGGNI	524.876	0.421138
FIRDCSVAL	5.68361	0.839406
FIRYGDASL	380.155	0.450952
FISGIQYLA	235.26	0.495305
FISSFLLPL	1	1
FITTMAPRV	32.4227	0.678472
FIVEHINAM	11	0.778379
FIVVATAAV	6.97382	0.820499
FIVYGRSNA	16866.5	0.100436
FIYAGSLSA	28.9486	0.688947
FIYFGKKQY	20000	0.0846866
FIYGYLEPV	1	1
FIYLALLEA	10.9212	0.779043
FIYLLFASM	172.855	0.523793
FIYSIMETI	21.3369	0.717144
FKAALSSLA	109428	0
FKDLFVVYR	500	0.425625
FKIDNNTFV	40815	0.0187595
FKNSSNLFT	64	0.615622
FKNSVFYSV	5540.83	0.20332
FKYDSTKPL	20000	0.0846866
FLAADALVL	2	0.935937
FLAAECPFL	1.89454	0.940944
FLAALFYTS	69.6857	0.607756
FLAASALGV	7.40889	0.814906
FLADAVVRL	52.4912	0.633944
FLADKKMTL	2	0.935937
FLADYGWRL	1	1
FLADYRGKT	1364.75	0.332821
FLAFFSNGV	13.7281	0.757902
FLAFLLFLV	8.32696	0.804109
FLAFVVFLL	1	1
FLAGALLLA	599	0.408929
FLAGGPHAV	1	1
FLAGVPSAV	5.90908	0.835811
FLAHLQWFA	1	1
FLAIKLYGV	1	1
FLALIICNA	39	0.661401
FLALVSNRV	7.44908	0.814406
FLAMLVLMA	2083	0.293741
FLAPDTRAV	10.6143	0.781678
FLAPDTRYV	13.5624	0.759025
FLAPELVRA	12.4187	0.767167
FLARAIVFV	1	1
FLARFWTRA	47.9784	0.642252
FLARKGIDT	1416.92	0.329354
FLARLHAAA	48	0.642211
FLARLIWWL	3.08413	0.895906
FLARSALIL	1.48144	0.963676
FLASLVVLA	1.69429	0.951268
FLATAGSAM	161.261	0.53021
FLATCVNGV	1.37579	0.970515
FLAVFQSAT	2.89283	0.901825
FLAVGGVLL	2.70534	0.908018
FLAVLSPTI	1	1
FLCAKCLGA	137.045	0.545249
FLCKQYLNL	224.286	0.49972
FLCPTFTLK	188	0.516031
FLCTADAAV	3.02046	0.897835
FLCWGPFFL	37.7425	0.66443
FLDDASNSA	42	0.654552
FLDDVIDVS	14	0.75609
FLDKGTYTL	1	1
FLDLPLPWA	10.4254	0.783337
FLDLPLPWL	33.7756	0.674694
FLDNECHTI	1	1
FLDPATTTS	1781	0.308218
FLDQVPFSV	2.17722	0.92809
FLDWIKDIM	19.3698	0.726083
FLEDLSYPA	1	1
FLEESHPGI	45.7844	0.646578
FLEPGPVTA	126.389	0.55273
FLEQGGFKA	64.7725	0.614513
FLEQQNKIL	495.776	0.426409
FLESGAVKY	26281.3	0.0594435
FLFAFLSAA	1	1
FLFDRLTNG	2	0.935937
FLFEMLKGV	5.0083	0.851097
FLFFATSDV	1	1
FLFGDDDAL	20	0.723124
FLFILLLCL	212.516	0.504702
FLFLAWIML	6.44055	0.827851
FLFLYWPHY	629	0.404412
FLFMDRDAL	52.4428	0.634029
FLFPDTRAV	5.235	0.847006
FLFPDTRGV	1	1
FLFPDTRYV	5.15222	0.848479
FLFQLNDTI	256.7	0.487244
FLGAGALAV	79.6677	0.595383
FLGDDPSPA	13.4843	0.759558
FLGFLATAG	309.276	0.470023
FLGGGGAGI	3583	0.243612
FLGGHVAVA	64.9873	0.614207
FLGGTTVCL	58211.6	0
FLGMESCGI	2.7247	0.907359
FLGQADFSL	8	0.807811
FLGRYMSAL	3.47656	0.884836
FLGSCICFI	11.6293	0.773237
FLGTSISGV	2.66262	0.909489
FLHDVENFL	11.5433	0.773923
FLHESDPMV	2	0.935937
FLHGGDFGV	1	1
FLHKRFTLV	1	1
FLHLTLIVL	5000	0.212813
FLHLYLFLT	564.079	0.41448
FLHNYILYA	1	1
FLHPKHWGT	157	0.532685
FLHSGTAKS	19	0.727865
FLHTTFIDV	1	1
FLHYCNSYA	3.57377	0.882288
FLIAYQPLL	22.3199	0.712981
FLICHNLRA	17.4238	0.735869
FLIDGPETA	17.8748	0.733507
FLIDLAFLI	2.08008	0.932308
FLIGELANL	20000	0.0846866
FLIGVYQQY	20000	0.0846866
FLIKFLLIH	296446	0
FLILAKPKE	37524.1	0.0265292
FLILCSVLL	20000	0.0846866
FLILPQAKK	64657.7	0
FLIPKGFYA	1	1
FLIRQLIRL	1.195	0.983536
FLISVIVLV	21.0924	0.718209
FLITGVFDI	1	1
FLIVSLCPT	1.23968	0.980142
FLIYFRSPL	11	0.778379
FLKDVEPLL	13.718	0.75797
FLKDVMESM	62.4968	0.617819
FLKDVMVEI	3.01107	0.898122
FLKIKVTAA	52.0494	0.634725
FLKNRFEAL	15	0.749713
FLKPEETFV	71	0.606029
FLKVPAQNA	11259.5	0.137786
FLLAKLTDI	10.2654	0.784766
FLLALLSCI	2.39109	0.91943
FLLALLSCL	2.80664	0.90462
FLLAQFTSA	97.9472	0.576292
FLLASVYSV	1	1
FLLDGGAPF	2	0.935937
FLLDYEGTL	6	0.8344
FLLFLVLIM	400.551	0.446122
FLLGLLVHV	6.40826	0.828315
FLLIHQGMH	9524.7	0.15325
FLLIRYITT	46.205	0.645733
FLLKQFHAA	52.8776	0.633266
FLLLADARV	6.20238	0.831334
FLLLTSIPI	1	1
FLLMDALKL	2.17102	0.928354
FLLMIVLQI	97.6343	0.576588
FLLMLCLHH	12197.5	0.13039
FLLNKEMYL	1.07178	0.993593
FLLPDAQSI	19.6112	0.724939
FLLPILSQI	52.733	0.633519
FLLPLTSLV	1	1
FLLPSLATV	1	1
FLLQLNETI	329.9	0.464057
FLLQRWGGT	8242.1	0.166618
FLLRGPFEA	11.127	0.777318
FLLRHLSSV	8.30047	0.804403
FLLRRWGGT	2015.3	0.296795
FLLRSIIVA	3.06334	0.896531
FLLRWEQEI	25.6	0.700309
FLLSGTAIA	2.01412	0.935287
FLLSLGIHL	11.5283	0.774043
FLLTRILTI	542.754	0.418042
FLLTSLRRA	22.8043	0.710997
FLLVAHYAI	15.9856	0.743831
FLLVTLAIL	1	1
FLLYILFLV	346	0.459653
FLMAPDLYV	6.35383	0.829104
FLMGFNRDV	1	1
FLMQIAILV	11.0596	0.777879
FLMRNAIQY	254	0.488221
FLMTATLED	2591.5	0.273553
FLNAFIPPV	1	1
FLNAWIPPV	1.11565	0.989885
FLNEDHWFS	9.68223	0.790172
FLNGSCGSV	5.77512	0.83793
FLNISWFYI	6.00773	0.834281
FLNPVIYTF	2	0.935937
FLNQANCKI	457.953	0.433744
FLNRFTTTL	7.9954	0.807864
FLNTLSFVC	943	0.366986
FLNWFIPPV	1	1
FLNWWIPEV	1	1
FLNWWIPGV	1	1
FLNWWIPPV	1	1
FLPDKAIDL	1	1
FLPDTRFAV	4.71323	0.856709
FLPDTRFFV	1.26572	0.978221
FLPDTRFGV	4.32715	0.864608
FLPDTRFYV	1.57928	0.957765
FLPGQYMNI	72.8924	0.603598
FLPIFFIFA	2340	0.282988
FLPKAAFAL	29.679	0.686644
FLPKAAYAL	2.93179	0.900588
FLPKLVVGE	12682.9	0.126783
FLPNPAFIH	2108.7	0.292608
FLPPQIPVI	21.7982	0.715167
FLPQIGGEA	1359.09	0.333206
FLPRVFSAV	83.1197	0.591463
FLPWHRLFL	112.3	0.563653
FLQDESAYV	10.7962	0.780107
FLQEALNIA	6.91514	0.82128
FLQGAKWYL	2	0.935937
FLQPTADLL	26.1344	0.698399
FLQQRKPPL	432	0.439136
FLQQSIFRF	154.766	0.534009
FLQRTDLSY	5000	0.212813
FLQSPPIRE	38012.7	0.0253335
FLRATTELR	56160.6	0
FLRDNLYHV	2	0.935937
FLRDNRAVL	20000	0.0846866
FLRFGDFKL	5.82848	0.83708
FLRGQAAAL	198.402	0.511053
FLRGRAYGI	264.105	0.484615
FLRGRAYGL	85.652	0.588689
FLRPVLKAM	11851.3	0.133052
FLRSCHWVL	582.449	0.411518
FLRYHCPGL	188.163	0.51595
FLRYLLFGI	2.48353	0.915924
FLSAADDLV	6.10981	0.832723
FLSAKTLTV	10.9986	0.77839
FLSDSEAEA	2.64449	0.91012
FLSDYGPQL	1	1
FLSFASLFL	1	1
FLSHDFTLV	1	1
FLSHHFTLV	1	1
FLSHKIHVI	2	0.935937
FLSHNFTLV	1	1
FLSHYFTLV	1.18924	0.983982
FLSLGLVSL	206	0.50758
FLSLMSLSI	3.50447	0.884098
FLSLSLLVI	736.097	0.38988
FLSNGHVTI	1	1
FLSRLVLYA	1	1
FLSRPINTI	528.009	0.420588
FLSRVFFCV	1	1
FLSSSALAV	2.5317	0.914149
FLSTLPSDV	76.413	0.599238
FLSYISDTV	1	1
FLTCTDRSV	83.3511	0.591206
FLTDYIPGA	1	1
FLTGTFVTA	14.5622	0.752451
FLTKKMTEV	2	0.935937
FLTPLSVTL	4.7225	0.856528
FLTQDLPLL	1	1
FLTQNFGPV	5	0.85125
FLTREILWA	4.15236	0.868419
FLTSELPQW	5000	0.212813
FLTSLLILV	1.10765	0.99055
FLTSVINRV	4.70919	0.856789
FLTTPVPSL	110.88	0.564829
FLVFVKPTT	515.556	0.422794
FLVGQLFTF	67.2458	0.61105
FLVGQLLTF	1679.92	0.313618
FLVIAINAM	1974.35	0.298692
FLVINRLGA	795.4	0.382719
FLVLIMLII	2302.22	0.284493
FLVPFVVFL	1	1
FLVPGTHVA	44.9634	0.648251
FLVSQLFTF	23.5964	0.707841
FLWDEAWYA	1	1
FLWEDQTLL	1	1
FLWEVTPTV	1.10396	0.990859
FLWEWASAR	2734.72	0.268582
FLWGPRALI	238.1	0.494196
FLWGPRALV	21.988	0.714366
FLWHVRKRV	204	0.508482
FLWLLWPVT	1	1
FLWSFLVLK	1417.73	0.329301
FLWSSIIFK	4434.77	0.2239
FLWVIILFQ	12737.9	0.126383
FLWWNAAPA	1	1
FLYAALLLA	17177	0.0987499
FLYALALLL	1.73205	0.949231
FLYDISISL	1.63864	0.954355
FLYDRIAST	5	0.85125
FLYDRLAST	27.4462	0.693873
FLYGAALLA	3.4	0.886895
FLYGALALA	2.4	0.919086
FLYGALLAA	6.3	0.82989
FLYGALLLA	2.6	0.911688
FLYGALRLA	7.1	0.818842
FLYGALVLA	39	0.661401
FLYGALYLA	2.2	0.927128
FLYGGLLLA	1.1	0.991191
FLYGWLFIL	101.9	0.572635
FLYLAFVAL	1966.47	0.299062
FLYNRPLNS	13.457	0.759745
FLYNRPLSV	146	0.539398
FLYNVYPGA	1.29953	0.975785
FLYPSWSLY	169	0.525878
FLYVVCSLA	4	0.871874
FMAAKAAHL	276.19	0.48048
FMAILQHHQ	1084.2	0.35409
FMASPENVI	13.1575	0.761826
FMAYTTSHI	3.24453	0.891221
FMDGKQACV	1	1
FMDGTMSQV	4.15552	0.868349
FMDPGIFPR	9.96655	0.787497
FMECNLNEL	38.49	0.662618
FMFDYIPPV	1	1
FMFNDLLKL	1	1
FMFNELLAL	1	1
FMFSTAATI	60.9103	0.620195
FMFSTVATI	44.394	0.649429
FMGAGSKAV	631	0.404118
FMGRIRSVY	9164	0.156818
FMGRLGPEY	20000	0.0846866
FMGVIYIMI	13	0.762939
FMGVLVNSL	239.104	0.493807
FMHEQGYSH	9723.4	0.151342
FMHIWLQAA	80.755	0.59413
FMHSAAPIT	302.591	0.472043
FMIDWILDA	3	0.898463
FMIVSISLV	16.1329	0.742984
FMKDGRSLV	219.782	0.501594
FMKVKFEAL	217	0.502772
FMLCLLLLS	2730.73	0.268717
FMLMPKQKV	123.966	0.554519
FMLNVSYLC	1053.96	0.356705
FMLPKQDIV	4.94904	0.852197
[truncated: 7,055 more rows]
