# Supplementary material for: OnionMHC: A Deep Learning Model for Peptide - HLA-A*02:01 Binding Predictions using both Structure and Sequence Feature Sets
Source: Research Square preprint supplement (doi:10.21203/rs.3.rs-124695/v1), 2020-12-15
Supplement: Supplementary file 6 [file 210d2bf4e9d94cfab0cd7251.xlsx]

## Sheet: Table S1
OnionMHC: a deep learning model for peptide - HLA-A*02:01 binding predictions using both structure and sequence feature sets
Shikhar Saxena, Sambhavi Animesh, Melissa J. Fullwood, and Yuguang Mu
Table S1: Detailed Results of Five Fold Cross Validation
	AUC					SRCC
	Fold 0	Fold 1	Fold 2	Fold 3	Fold 4	Fold 0	Fold 1	Fold 2	Fold 3	Fold 4
emb_lstm	0.954	0.954	0.95	0.958	0.961	0.808	0.813	0.808	0.826	0.826
emb_cnn	0.954	0.954	0.95	0.958	0.961	0.792	0.797	0.79	0.806	0.805
one_lstm	0.95	0.953	0.949	0.956	0.958	0.809	0.812	0.809	0.828	0.821
one_cnn	0.937	0.623	0.943	0.939	0.95	0.783	0.203	0.795	0.8	0.803
bls_lstm	0.953	0.953	0.949	0.958	0.959	0.813	0.816	0.814	0.836	0.826
bls_cnn	0.945	0.943	0.937	0.944	0.949	0.794	0.8	0.788	0.816	0.799
